# Supplementary material for: Exploring membrane-associated NAC transcription factors in Arabidopsis: implications for membrane biology in genome regulation
Source: PubMed Central journal article supplement — Nucleic Acids Res. 2006 Dec 7;35(1):203–13. doi: 10.1093/nar/gkl1068 (PMC1802569; doi:10.1093/nar/gkl1068), 2006-12-07
Supplement: nar_gkl1068_1.pdf [file nar_gkl1068_1.pdf]

## Supplementary Material

| NTLs   | Groups | Subgroups | NAC proteins |
|--------|--------|-----------|--------------|
| NTL1   | I      | NAC2      | ANAC013      |
| NTL2   | I      | TIP       | ANAC014      |
| NTL3   | I      | NAC2      | ANAC016      |
| NTL4   | I      | NAC2      | ANAC053      |
| NTL5   | I      | OsNAC8    | ANAC060      |
| NTL6   | I      | TIP       | ANAC062      |
| NTL7   | I      | NAC2      | ANAC017      |
| NTL8   | I      | OsNAC8    | ANAC040      |
| NTL9   | I      | TIP       | -            |
| NTL10  | II     | ANAC001   | ANAC001      |
| NTL11  | I      | NAC2      | ANAC078      |
| NTL12  | II     | ANAC001   | ANAC068      |
| NTL13  | II     | ANAC001   | ANAC069      |
| OsNTL1 | I      | TIP       | ONAC019      |
| OsNTL2 | I      | TIP       | ONAC037      |
| OsNTL3 | I      | OsNAC8    | ONAC074      |
| OsNTL4 | I      | NAC2      | ONAC051      |
| OsNTL5 | I      | NAC2      | ONAC040      |
| OsNTL6 | I      | NAC2      | ONAC070      |

**Figure S1.** Phylogenetic relationship of NTLs to the whole NAC family. The NAC proteins in *Arabidopsis* and rice have been classified into two major groups, I and II, that contain 14 and 4 subfamilies, respectively (S1). It is notable that the NTL proteins are mostly clustered in a few subfamilies of group I, such as NAC2, TIP, and OsNAC8. Only three of the 19 NTLs belong to group II. NTL9, which belongs to subgroup TIP of group I, has not been included in the original classification.

S1. Ooka,H., Satoh,K., Doi,K., Nagata,T., Otomo,Y., Murakami,K., Matsubara,K., Osato,N., Kawai,J., Carninci,P., Hayashizaki,Y., Suzuki,K., Kojima,K., Takahara,Y., Yamamoto,K. and Kikuchi,S. (2003) Comprehensive analysis of NAC family genes in *Oryza sativa* and *Arabidopsis thaliana*. *DNA Res.*, **10**, 239-247.

| NTLs  | cold        | heat        | drought | NaCl        | H2O2        | ABA         | ACC  | BL  | IAA  | GA  | NPA  | PAC  |
|-------|-------------|-------------|---------|-------------|-------------|-------------|------|-----|------|-----|------|------|
| NTL1  | <b>2.07</b> | <b>2.15</b> | 0.91    | <b>7.03</b> | 1.02        | <b>3.47</b> | 1.11 | 0.8 | 1.08 | 1.4 | 1    | 0.69 |
| NTL2  | 0.79        | 1.29        | 1.18    | 0.81        | 0.75        | 0.54        | 0.95 | 0.6 | 1.09 | 0.9 | 0.98 | 1.67 |
| NTL3  | 0.39        | 0.97        | 0.5     | 1.63        | 0.62        | 0.48        | 0.61 | 1   | 0.98 | 0.6 | 0.76 | 0.97 |
| NTL4  | 1.5         | 1.59        | 1.25    | <b>2.35</b> | <b>3.13</b> | 1.86        | 0.74 | 0.8 | 0.94 | 0.7 | 0.96 | 0.95 |
| NTL5  |             |             |         |             |             |             |      |     |      |     |      |      |
| NTL6  | <b>2.03</b> | 1.22        | 0.86    | <b>3.65</b> | <b>3.66</b> | 1.15        | 0.96 | 1   | 1.23 | 1.1 | 0.77 | 0.69 |
| NTL7  | 1.27        | 1.04        | 1.02    | 0.93        | 1.05        | 1.01        | 0.94 | 0.9 | 0.94 | 0.9 | 0.87 | 1.07 |
| NTL8  | 1.23        | 1.15        | 1.08    | <b>2.02</b> | 1.31        | 0.73        | 1.14 | 0.4 | 0.95 | 0.9 | 0.83 | 1.13 |
| NTL9  | 0.79        | 1.46        | 1.23    | 1.33        | 0.88        | 1.12        | 1.23 | 1.1 | 1.13 | 1.4 | 0.54 | 0.5  |
| NTL10 | 1.49        | 0.83        | 1.29    | <b>2.92</b> | 0.99        | 0.97        | 1.54 | 0.5 | 1.47 | 1.1 | 0.9  | 1.06 |
| NTL11 | 1.13        | 1.68        | 0.95    | 1.42        | 1.25        | 1.13        | 1.08 | 1   | 1.07 | 1   | 1.2  | 1.04 |

- Induced (bold) or repressed both in our and previous assays
- Induced (bold) or repressed in the previous assays but unaltered in our assays
- Unaltered in the previous assays but altered in our assays
- Unaltered both in our and previous assays

**Figure S2.** Comparison of *NTL* gene expression patterns to those in the transcriptome database GENEVESTIGATOR.

Effects of diverse stress conditions and growth hormones on the *NTL* expressions were compared to those in the GENEVESTIGATOR database (S2). Those induced by more than two-fold or repressed by more than 50% were considered here. Note that most of the up-regulated genes in the database were also induced by similar treatments in our assay system. The numbers denote fold changes in gene expressions and were extracted from the database.

S2. Zimmermann,P., Hirsch-Hoffmann,M., Hennig,L. and Gruissem,W. (2004) GENEVESTIGATOR. *Arabidopsis* microarray database and analysis toolbox. *Plant Physiol.*, **136**, 2621-2632.

| Gene Loci  | Chromosome No | AAs | Exons | Gene No       |
|------------|---------------|-----|-------|---------------|
| Os06g01230 | 6             | 683 | 6     | <i>osNTL1</i> |
| Os08g06140 | 8             | 729 | 7     | <i>osNTL2</i> |
| Os01g15640 | 1             | 489 | 4     | <i>osNTL3</i> |
| Os09g32040 | 9             | 702 | 4     | <i>osNTL4</i> |
| Os08g44820 | 8             | 656 | 5     | <i>osNTL5</i> |
| Os02g57650 | 2             | 632 | 5     | <i>osNTL6</i> |

**Figure S3.** Rice *NTL* genes (*OsNTLs*).

They were predicted via the membrane protein database ARAMEMNON (S3). Those with hydrophobicity values of higher than 0.85 were listed.

S3. Schwacke,R., Schneider,A., van der Graaff,E., Fischer,K., Catoni,E., Desimone,M., Frommer,W.B., Flügge,U.-I. and Kunze,R. (2003) ARAMEMNON, a novel database for *Arabidopsis* integral membrane proteins. *Plant Physiol.*, **131**, 16-26.

| <b>TF Family</b> | <b>Total Number</b> | <b>Predicted MTFs</b> |
|------------------|---------------------|-----------------------|
| MYB              | 190                 | 2                     |
| AP2/EREBP        | 144                 | 1                     |
| bHLH             | 139                 | 5                     |
| C2H2             | 105                 | 4                     |
| HB               | 89                  | 1                     |
| MADS box         | 82                  | 4                     |
| bZIP             | 81                  | 6                     |
| WRKY             | 72                  | 1                     |
| C2C2             | 104                 | 2                     |
| TCP              | 25                  | 1                     |
| C3H              | 33                  | 2                     |
| SBP              | 16                  | 4                     |
| NAC              | 109                 | >13                   |

**Figure S4.** Putative MTFs in *Arabidopsis* genome.

The *Arabidopsis* transcription factors were analyzed using the ARAMEMNON membrane protein database (S3) to identify putative MTFs. MTFs were identified from most of the major transcription factor (TF) families in *Arabidopsis*.
